# Supplementary material
Source: PubMed Central journal article supplement (PMC3486949)
Supplement: NIHMS394536-supplement-Supplementary_Material_S1.pdf [file NIHMS394536-supplement-Supplementary_Material_S1.pdf]

# Supplementary Material

## Predicting $\text{Ca}^{2+}$ -binding Sites Using Refined Carbon Clusters

*Kun Zhao<sup>1</sup>, Xue Wang<sup>2</sup>, Hing C. Wong<sup>2</sup>, Robert Wohlhueter<sup>2</sup>, Michael Kirberger<sup>2</sup>, Guantao Chen<sup>1</sup> and  
Jenny J. Yang<sup>\*2</sup>*

<sup>1</sup>Department of Mathematics and Statistics, Georgia State University, Atlanta, GA, 30303

<sup>2</sup>Department of Chemistry, Center for Drug Design and Biotechnology, Georgia State University,  
Atlanta, GA, 30303

**Table S1.** Adjacent matrix for carbon atoms graph representing binding loop of D20-E31 from calmodulin (3CLN.pdb)

| C ID  | D20C | D20CG | K21C | D22C | D22CG | G23C | D24C | D24CG | G25C | T26C | T26CB | I27C | T28C | T28CB | T29C | T29CB | K30C | E31C | E31CD |
|-------|------|-------|------|------|-------|------|------|-------|------|------|-------|------|------|-------|------|-------|------|------|-------|
| D20C  | 1    | 1     | 1    | 1    | 1     | 1    | 0    | 1     | 0    | 1    | 0     | 0    | 0    | 0     | 0    | 0     | 0    | 1    | 1     |
| D20CG | 1    | 1     | 1    | 1    | 1     | 1    | 1    | 1     | 1    | 1    | 1     | 1    | 0    | 0     | 0    | 0     | 0    | 0    | 1     |
| K21C  | 1    | 1     | 1    | 1    | 1     | 1    | 0    | 0     | 0    | 0    | 0     | 0    | 0    | 0     | 0    | 0     | 0    | 0    | 1     |
| D22C  | 1    | 1     | 1    | 1    | 1     | 1    | 1    | 1     | 0    | 0    | 0     | 0    | 0    | 0     | 0    | 0     | 0    | 0    | 1     |
| D22CG | 1    | 1     | 1    | 1    | 1     | 1    | 1    | 1     | 0    | 1    | 0     | 0    | 0    | 1     | 0    | 0     | 0    | 0    | 1     |
| G23C  | 1    | 1     | 1    | 1    | 1     | 1    | 1    | 1     | 1    | 1    | 0     | 0    | 0    | 0     | 0    | 0     | 0    | 0    | 1     |
| D24C  | 0    | 1     | 0    | 1    | 1     | 1    | 1    | 1     | 1    | 1    | 1     | 0    | 0    | 0     | 0    | 0     | 0    | 0    | 0     |
| D24CG | 1    | 1     | 0    | 1    | 1     | 1    | 1    | 1     | 1    | 1    | 1     | 0    | 0    | 1     | 0    | 0     | 0    | 0    | 1     |
| G25C  | 0    | 1     | 0    | 0    | 0     | 1    | 1    | 1     | 1    | 1    | 1     | 1    | 0    | 0     | 0    | 0     | 0    | 0    | 0     |
| T26C  | 1    | 1     | 0    | 0    | 1     | 1    | 1    | 1     | 1    | 1    | 1     | 1    | 1    | 1     | 0    | 0     | 0    | 0    | 1     |
| T26CB | 0    | 1     | 0    | 0    | 0     | 0    | 1    | 1     | 1    | 1    | 1     | 1    | 0    | 1     | 0    | 0     | 0    | 0    | 1     |
| I27C  | 0    | 1     | 0    | 0    | 0     | 0    | 0    | 0     | 1    | 1    | 1     | 1    | 1    | 1     | 1    | 1     | 1    | 1    | 1     |
| T28C  | 0    | 0     | 0    | 0    | 0     | 0    | 0    | 0     | 0    | 1    | 0     | 1    | 1    | 1     | 1    | 1     | 1    | 1    | 1     |
| T28CB | 0    | 0     | 0    | 0    | 1     | 0    | 0    | 1     | 0    | 1    | 1     | 1    | 1    | 1     | 1    | 1     | 1    | 1    | 1     |
| T29C  | 0    | 0     | 0    | 0    | 0     | 0    | 0    | 0     | 0    | 0    | 0     | 1    | 1    | 1     | 1    | 1     | 1    | 1    | 1     |
| T29CB | 0    | 0     | 0    | 0    | 0     | 0    | 0    | 0     | 0    | 0    | 0     | 1    | 1    | 1     | 1    | 1     | 1    | 1    | 0     |
| K30C  | 0    | 0     | 0    | 0    | 0     | 0    | 0    | 0     | 0    | 0    | 0     | 1    | 1    | 1     | 1    | 1     | 1    | 1    | 1     |
| E31C  | 1    | 0     | 0    | 0    | 0     | 0    | 0    | 0     | 0    | 0    | 0     | 1    | 1    | 1     | 1    | 1     | 1    | 1    | 1     |
| E31CD | 1    | 1     | 1    | 1    | 1     | 1    | 0    | 1     | 0    | 1    | 1     | 1    | 1    | 1     | 1    | 0     | 1    | 1    | 1     |

Binding loop of D20-E31 from calmodulin (3CLN.pdb) is used as example to illustrate how the adjacent matrix is constructed for the Figure 2d in the Methods section. In the Table S1, “D20C” represents the mainchain carbon from the 20th Asp while the “D20CG” represents the sidechain gamma carbon from the same residues. “1” represents the distance between two carbon atoms is smaller than 7.5Å; “0” otherwise. In this example, the distance cutoff of C-C is 7.5Å.

**Table S2.** The parameters used in the dataset for MUG<sup>C</sup> in X-ray and NMR.

|                          | X-ray                                   | NMR                                     |
|--------------------------|-----------------------------------------|-----------------------------------------|
| Cutoff of maximum clique | 7.5Å                                    | 8.3Å                                    |
| dist(ca,c1)              | (2.5Å ,4.5Å)                            | (1.74Å ,4.9Å)                           |
| dist(ca,c2)              | > dist(ca,c1)                           | > dist(ca,c1)-0.5                       |
| angle(ca,c1,c2)          | (>90)                                   | (>70)                                   |
| Center of Mass           |                                         |                                         |
| R-Ca (sidechain O)       | (<4.3)                                  | (<4.5)                                  |
| Ca-O (mainchain O)       | (<Ca-R)                                 | (<Ca-R)                                 |
| Clash                    | Van der waals radius                    | Van der waals radius                    |
| Ca-N                     | (>2.55)                                 | (>2.55)                                 |
| Ca-C                     | (>1.74 <sup>a</sup> /2.7 <sup>b</sup> ) | (>1.74 <sup>a</sup> /2.7 <sup>b</sup> ) |
| Ca-O                     | (>1.6)                                  | (>1.6)                                  |

<sup>a, b</sup>: 1.74 for monodentate and 2.7 for bidentate

**Table S3.** Summary of X-ray training dataset.

| PDB <sup>a</sup> | Res <sup>b</sup> | Protein <sup>c</sup>                                          | Chain <sup>d</sup> | Size <sup>e</sup> |
|------------------|------------------|---------------------------------------------------------------|--------------------|-------------------|
| 1ALA             | 2.25             | Annexin V                                                     | A                  | 316               |
| 1ALV             | 1.90             | Calpain A                                                     | A                  | 173               |
| 1AUI             | 2.10             | Calcineurin                                                   | A, B               | 635               |
| 1AVS             | 1.75             | TroponinC                                                     | A, B               | 163               |
| 1B9O             | 1.15             | Lactalbumin                                                   | A                  | 123               |
| 1EXR             | 1.00             | Calmodulin                                                    | A                  | 146               |
| 1FJ3             | 2.00             | Thermolysin                                                   | A                  | 317               |
| 1GLG             | 2.00             | Galactosebinding                                              | A                  | 310               |
| 1NLS             | 0.94             | Concanavalin A                                                | A                  | 237               |
| 1PSH             | 2.30             | Phospholipase A2                                              | A,B,C              | 357               |
| 1SCD             | 2.30             | Subtilisin Carlsberg lightly cross-linked with glutaraldehyde | A                  | 275               |
| 1SNC             | 1.65             | Staphylocooal Nuclease                                        | A                  | 135               |
| 1THM             | 1.37             | Thermitase                                                    | A                  | 279               |
| 2PRK             | 1.50             | Proteinase K                                                  | A                  | 279               |
| 3EST             | 1.65             | Elastase                                                      | A                  | 230               |
| 4ICB             | 1.60             | Calbindin                                                     | A                  | 76                |
| 5PAL             | 1.54             | Parvalbumin                                                   | A                  | 109               |

<sup>a</sup> PDB code. <sup>b</sup> PDB resolution. <sup>c</sup> Protein name. <sup>d</sup> Chain number. <sup>e</sup> Number of residues.

**Table S4.** Summary of X-ray testing dataset.

| PDB <sup>a</sup> | Res <sup>b</sup> | Protein <sup>c</sup>                                                                                             | Chain <sup>d</sup>  | Size <sup>e</sup>    |
|------------------|------------------|------------------------------------------------------------------------------------------------------------------|---------------------|----------------------|
| 1BJR             | 2.44             | Complex:lactoferrin fragment and proteinase K                                                                    | E, I                | 289                  |
| 1JDA             | 2.20             | Maltotetraose forming exo-amylase                                                                                | A                   | 418                  |
| 1FZC             | 2.30             | Fibrin                                                                                                           | A,B,C,D,E,F,G,H,I,J | 1382                 |
| 1SBH             | 1.80             | Subtilisin                                                                                                       | A                   | 275                  |
| 1OBR             | 2.30             | Carboxypeptidase T                                                                                               | A                   | 323                  |
| 1EGZ             | 2.30             | Cellulase                                                                                                        | A, B, C             | 873                  |
| 1ESL             | 2.00             | E-Selectin                                                                                                       | A                   | 157                  |
| 1AI4             | 2.35             | Penicillin acylase                                                                                               | A, B                | 763                  |
| 1ATL             | 1.80             | Atrolysin C                                                                                                      | A, B                | 500                  |
| 1AX0             | 1.90             | Lectin                                                                                                           | A                   | 239                  |
| 1B9Z             | 2.10             | $\beta$ -Amylase                                                                                                 | A                   | 516                  |
| 1BF2             | 2.00             | Pseudomonas Isoamylase                                                                                           | A                   | 750                  |
| 1CE5             | 1.90             | $\beta$ -Trypsin                                                                                                 | A                   | 230                  |
| 1CLX             | 1.80             | Xylanase                                                                                                         | A, B, C, C          | 1380                 |
| 1GCG             | 1.90             | Galactose binding protein                                                                                        | A                   | 309                  |
| 1HYT             | 1.70             | Thermolysin                                                                                                      | A                   | 316                  |
| 1IAG             | 2.00             | Adamalysin (II)                                                                                                  | A                   | 201                  |
| 1IRB             | 1.70             | Carboxylic ester hydrolase                                                                                       | A                   | 123                  |
| 1JS4             | 2.00             | Endoexocellulase E4                                                                                              | A, B                | 1210                 |
| 1KBC             | 1.80             | Neutrophil collagenase                                                                                           | A, B                | 328                  |
| 1KIT             | 2.30             | Hydrolase                                                                                                        | A                   | 757                  |
| 1KVX             | 1.90             | Carboxylic ester hydrolase                                                                                       | A                   | 123                  |
| 1MMQ             | 1.90             | Matrilysin                                                                                                       | A                   | 165                  |
| 1NBC             | 1.75             | Cellusomal scaffolding Protein A                                                                                 | A, B                | 310                  |
| 1OAC             | 2.00             | Amine oxidase                                                                                                    | A, B                | 1443                 |
| 1OIL             | 2.10             | Lipase                                                                                                           | A, B                | 640                  |
| 1SBF             | 2.43             | Soybean agglutinin                                                                                               | A                   | 234                  |
| 1SRA             | 2.00             | Calcium biniding protein                                                                                         | A                   | 151                  |
| 1TCM             | 2.20             | Cyclodextrin glycosyl Transferase                                                                                | A, B                | 1372                 |
| 1TN3             | 2.00             | Tetranectin                                                                                                      | A                   | 137                  |
| 2FIB             | 2.01             | Fibrogen                                                                                                         | A, B                | 254                  |
| 2TEP             | 2.50             | Peanut lectin                                                                                                    | A, B, C, E          | 928                  |
| 4LIP             | 1.75             | Lipase                                                                                                           | D, E                | 638                  |
| 1C9M             | 1.67             | Bacillus lentus subtilisin                                                                                       | A                   | 269                  |
| 2SCP             | 2.00             | Sarcoplasmic Ca(2+)-binding protein (SCP)                                                                        | A, B                | 174                  |
| 1TVG             | 1.6              | HSPC034                                                                                                          | A                   | 153                  |
| 2GGM             | 2.35             | Human centrin 2 xeroderma pigmentosum group C protein complex                                                    | A,B,C,D             | 172                  |
| 3FIA             | 1.45             | Human intersectin-1 protein                                                                                      | A                   | 121                  |
| 1K9K             | 1.76             | calcium bound human S100A6                                                                                       | A, B                | 90                   |
| 1DAN             | 2.00             | Complex of active site inhibited human blood coagulation factor via with human recombinant soluble tissue factor | L, H, T, U, C       | 152, 254, 80, 121, 4 |
| 1MHO             | 2.00             | S100B from bovine brain                                                                                          | A                   | 88                   |
| 1EDH             | 2.00             | E-cadherin domains 1 and 2 in complex with calcium                                                               | A, B                | 226                  |
| 2EGD             | 1.8              | human S100A13                                                                                                    | A, B                | 98                   |

<sup>a</sup> PDB code. <sup>b</sup> PDB resolution. <sup>c</sup> Protein name. <sup>d</sup> Chain number. <sup>e</sup> Number of residues.

**Table S5.** Prediction results on the X-ray training dataset.

| PDB ID | Ca# <sup>a</sup> | Documented Ligands                 | Predicted Ligands                  | R <sup>b</sup> |
|--------|------------------|------------------------------------|------------------------------------|----------------|
| 1ALA   | 2505             | M28, G32, T37, E72                 | M28, G32, E72                      | 3/4            |
|        | 2506             | I100, G102, G104, E144             | I100, G102, G104, E144             | 4/4            |
|        | 2507             | M259, G261, G263, D303             | M259, G261, G263, D303             | 4/4            |
| 1ALV   | 3425             | A107, D110, E112, E117             | A107, D110, E112, E117             | 4/4            |
|        | 3426             | D150, D152, T154, K156, E161       | D150, D152, T154, K156, E161       | 5/5            |
|        | 3427             | D180, D182, S184, T186, E191       | D180, D182, S184, T186, E191       | 5/5            |
|        | 3428             | D135, D223, D225, N226             | D135, D223, D225, N226             | 4/4            |
| 1AUI   | 4393             | D30, D32, S34, S36, E41            | D30, D32, S34, S36, E41            | 5/5            |
|        | 4394             | D62, D64, N66, E68, E73            | D62, D64, N66, E68, E73            | 5/5            |
|        | 4395             | D99, D101, D103, Y105, E110        | D99, D101, D103, Y105, E110        | 5/5            |
|        | 4396             | D140, D142, D144, R146, E151       | D140, D142, D144, R146, E151       | 4/4            |
| 1AVS   | 1266             | D30, D32, D36, E41                 | D30, D32, D36, E41                 | 4/4            |
|        | 1267             | D66, D68, S70, T72, E77            | D66, D68, S70, T72, E77            | 3/3            |
|        | 1268             | D30, D32, D36, E41                 | D30, D32, D36, E41                 | 3/3            |
|        | 1269             | D66, D68, S70, T72, E77            | D66, D68, S70, T72, E77            | 4/4            |
| 1B9O   | 1032             | K79, D82, D84, D87                 | K79, D82, D84, D87                 | 4/4            |
| 1EXR   | 1469             | D20, D22, D24, T26, E31            | D20, D22, D24, T26, E31            | 5/5            |
|        | 1470             | D56, D58, N60, T62, E67            | D56, D58, N60, T62, E67            | 5/5            |
|        | 1471             | N129, D131, D133, H135, E140       | N129, D131, D133, H135, E140       | 5/5            |
|        | 1472             | E47                                | -                                  | -              |
|        | 1473             | D93, D95, N97, L99, E104           | D93, D95, N97, L99, E104           | 5/5            |
|        | 2461             | D138, E177, D185, E187, E190       | D138, E177, D185, E187, E190       | 4/4            |
| 1FJ3   | 2462             | E177, D185, E190                   | E177, D185, E190                   | 3/3            |
|        | 2463             | D57, D59, G61                      | -                                  | 0/3            |
|        | 2464             | Y193, T194, I197, D200             | Y193, T194, I197, D200             | 4/4            |
|        | 2362             | D134, N136, D138, Q140, Q142, E205 | D134, N136, D138, Q140, Q142, E205 | 6/6            |
|        | 715              | S20, E23, D25, T28, E33            | S20, E23, D25, T28, E33            | 5/5            |
| 1GLG   | 716              | D61, N65, D65, E67, E72            | D61, N65, D65, E67, E72            | 5/5            |
|        | 1875             | D10, Y12, N14, D19                 | D10, Y12, N14, D19                 | 4/4            |
| 1K96   | 2788             | Y27, G29, G31, D48                 | Y27, G29, G31, D48                 | 4/4            |
|        | 2789             | Y27, G29, G31, D48                 | Y27, G29, G31, D48                 | 4/4            |
|        | 2790             | Y27, G29, G31, D48                 | Y27, G29, G31, D48                 | 4/4            |
| 1NLS   | 1875             | D10, Y12, N14, D19                 | D10, Y12, N14, D19                 | 4/4            |
|        | 2788             | Y27, G29, G31, D48                 | Y27, G29, G31, D48                 | 4/4            |
| 1PSH   | 2789             | Y27, G29, G31, D48                 | Y27, G29, G31, D48                 | 4/4            |
|        | 2790             | Y27, G29, G31, D48                 | Y27, G29, G31, D48                 | 4/4            |
|        | 1922             | D41, L75, N77, T79, V81            | D41, L75, N77, T79, V81            | 5/5            |
| 1SCD   | 1923             | A169, Y171, V174                   | -                                  | 4/4            |
|        | 1184             | D21, D40, T41                      | D21, T41                           | 2/3            |
| 1SNC   | 2005             | D5, D47, V82, N85, T87, I89        | D5, D47, V82, N85, T87, I89        | 4/4            |
|        | 2006             | D57, D62, T64, Q66                 | D57, D62, Q66                      | 3/4            |
| 2PRK   | 2019             | P175, V177, D200                   | P175, V177, D200                   | 3/3            |
|        | 2020             | T16, D260                          | -                                  | 2/2            |
| 3EST   | 1824             | E70, N72, Q75, N77, E80            | E70, N72, Q75, N77, E80            | 5/5            |
| 4ICB   | 641              | A14, E17, D19, Q22, E27            | A14, E17, D19, Q22, E27            | 5/5            |
|        | 642              | D54, N56, D58, E60, E65            | D54, N56, D58, E60, E65            | 5/5            |
| 5PAL   | 843              | D90, D92, D94, K96, E101           | D90, D92, D94, K96, E101           | 4/4            |
|        | 844              | D51, D53, S55, F57, E59, E62       | D51, D53, S55, F57, E59, E62       | 6/6            |

<sup>a</sup>: metal identification number in PDB file. <sup>b</sup>: the correctly predicted ligands over documented ligands

**Table S6.** Prediction results on the X-ray testing dataset.

| PDB ID | Ca# <sup>a</sup> | Documented Ligands                 | Predicted Ligands                  | R <sup>b</sup> |
|--------|------------------|------------------------------------|------------------------------------|----------------|
| 1BJR   | 2090             | P175, V177, D200                   | P175, V177, D200                   | 3/3            |
|        | 2089             | R12, S15, N257, A273               | -                                  | 0/4            |
| 1JDA   | 3299             | N116, D151, D154, D162, G197       | N116, D151, D154, D162, G197       | 5/5            |
|        | 3300             | D1, Q2, H13, D16, E17              | D1, Q2, H13, D16, E17              | 5/5            |
| 1FZC   | 11170            | D381, D383, W385                   | D381, D383, W385                   | 3/3            |
|        | 11171            | D318, D320, F322, G324             | D318, D320, F322, G324             | 4/4            |
|        | 11172            | D381, D383, W385                   | D381, D383, W385                   | 3/3            |
|        | 11173            | D318, D320, F322, G324             | D318, D320, F322, G324             | 4/4            |
| 1SBH   | 1942             | Q2, D41, L75, N77, V81             | Q2, D41, L75, N77, V81             | 5/5            |
|        | 1943             | A169, Y171, V174                   | -                                  | 0/3            |
| 1OBR   | 2584             | D56, E57, E61, E104                | D56, E57, E61, E104                | 4/4            |
|        | 2585             | S50, D51, E57, E59                 | S50, D51, E57, E59                 | 4/4            |
|        | 2586             | D51, E59, N101                     | D51, E59, N101                     | 3/3            |
|        | 2587             | S7, Y9, E14                        | S7, Y9, E14                        | 3/3            |
| 1EGZ   | 6810             | G121, D158, D160, N161             | G121, D158, D160, N161             | 4/4            |
|        | 6811             | G121, D158, D160, N161             | G121, D158, D160, N161             | 4/4            |
|        | 6812             | G121, D158, D160, N161             | G121, D158, D160, N161             | 4/4            |
| 1ESL   | 1267             | E80, N82, N105, D106               | E80, N82, N105, D106               | 4/4            |
|        | 1268             | E33, E36                           | -                                  | 0/2            |
|        | 1270             | Q20, Y23                           | -                                  | 0/2            |
| 1AI4   | 6074             | E152, D73, V75, D76, P205, D252    | E152, D73, V75, D76, P205, D252    | 6/6            |
| 1ATL   | 3260             | E9, D93, C197, N200                | E9, D93, C197, N200                | 4/4            |
|        | 3262             | E9, D93, C197, N200                | E9, D93, C197, N200                | 4/4            |
| 1AX0   | 1996             | D129, F131, N133, D136             | D129, F131, N133, D136             | 4/4            |
| 1B9Z   | 4310             | D56, D60, Q61, E141, E144          | D56, D60, Q61, E141, E144          | 5/5            |
| 1BF2   | 5737             | D128, E229, T230, N232, D259       | D128, E229, T230, N232, D259       | 5/5            |
| 1CE5   | 1631             | E70, N72, V75, E80                 | E70, N72, V75, E80                 | 4/4            |
| 1CLX   | 10801            | N253, D256, N258, N261, D262       | N253, D256, N258, N261, D262       | 5/5            |
|        | 10802            | N253, D256, N258, N261, D262       | N253, D256, N258, N261, D262       | 5/5            |
|        | 10803            | N253, D256, N258, N261, D262       | N253, D256, N258, N261, D262       | 5/5            |
|        | 10804            | N253, D256, N258, N261, D262       | N253, D256, N258, N261, D262       | 5/5            |
| 1GCG   | 2895             | D134, N136, D138, K140, Q142, E205 | D134, N136, D138, K140, Q142, E205 | 6/6            |
| 1HYT   | 2440             | D138, E177, D185, E187, E190       | D138, E177, D185, E187, E190       | 5/5            |
|        | 2441             | E177, N183, D185, E190             | E177, N183, D185, E190             | 4/4            |
|        | 2442             | D57, D59, N61                      | -                                  | 0/3            |
|        | 2443             | Y193, T194, I197, D200             | Y193, T194, I197, D200             | 4/4            |
| 1IAG   | 1623             | E9, D93, C197, N200                | E9, D93, C197, N200                | 4/4            |
| 1IRB   | 951              | Y28, G30, G32, D49                 | Y28, G30, G32, D49                 | 4/4            |
| 1JS4   | 9586             | S210, G211, D214, E215, D261       | S210, G211, D214, E215, D261       | 5/5            |
|        | 9587             | T504, D506, D571, N574, D575       | T504, D506, D571, N574, D575       | 5/5            |
|        | 9588             | S210, G211, D214, E215, D261,      | S210, G211, D214, E215, D261,      | 5/5            |
|        | 9589             | T504, D506, D571, N574, D 575      | T504, D506, D571, N574, D 575      | 5/5            |
| 1KBC   | 2591             | D137, G169, G171, D173,            | D137, G169, G171, D173,            | 4/4            |
|        | 2592             | D154, G155, N157, I159, D177, E180 | D154, G155, N157, I159, D177, E180 | 6/6            |
|        | 2595             | D137, G169, G171, D173             | D137, G169, G171, D173             | 4/4            |
|        | 2596             | D154, G155, N157, I159, D177, E180 | D154, G155, N157, I159, D177, E180 | 6/6            |
| 1KIT   | 5861             | A253, N256, D289, T313             | A253, N256, D289, T313             | 4/4            |
|        | 5862             | D621, D682, A683                   | D621, D682, A683                   | 3/3            |
| 1KVX   | 956              | Y28, G30, G32, D49                 | Y28, G30, G32, D49                 | 4/4            |
| 1MMQ   | 1272             | D175, G176, G178, T180, D198, E201 | D175, G176, G178, T180, D198, E201 | 6/6            |
|        | 1273             | D158, G190, G192, D194             | D158, G190, G192, D194             | 4/4            |
| 1NBC   | 2437             | T44, D46, T122, N125, D126         | T44, D46, T122, N125, D126         | 5/5            |

|       |       |                               |                               |                         |
|-------|-------|-------------------------------|-------------------------------|-------------------------|
| 1OAC  | 2438  | T44, D46, T122, N125, D126    | T44, D46, T122, N125, D126    | 5/5                     |
|       | 11388 | D533, L534, D535, D678, A679  | D533, L534, D535, D678, A679  | 5/5                     |
|       | 11389 | E573, Y667, D670, E672        | E573, Y667, D670, E672        | 4/4                     |
|       | 11391 | D533, L534, D535, D678, A679  | D533, L534, D535, D678, A679  | 5/5                     |
|       | 11392 | E573, Y667, D670, E672        | E573, Y667, D670, E672        | 4/4                     |
| 1OIL  | 4677  | D242, D288, Q292, V296        | D242, D288, Q292, V296        | 4/4                     |
|       | 4678  | D242, D288, Q292, V296        | D242, D288, Q292, V296        | 4/4                     |
| 1SBF  | 1735  | D126, F128, N130, D133        | D126, F128, N130, D133        | 4/4                     |
| 1SRA  | 1264  | D222, P225, D227, Y229, E234  | D222, P225, D227, Y229, E234  | 4/4                     |
|       | 1265  | D257, D259, D261, Y263, E268  | D257, D259, D261, Y263, E268  | 5/5                     |
|       | 1266  | P241, I243, E246              | -                             | 0/3                     |
| 1TCM  | 10513 | D27, N29, N32, N33, G51, D53  | D27, N29, N32, N33, G51, D53  | 4/4                     |
|       | 10514 | N139, I190, D199, H233        | N139, I190, D199, H233        | 4/4                     |
|       | 10515 | D27, N29, N32, N33, G51, D53  | D27, N29, N32, N33, G51, D53  | 5/5                     |
|       | 10616 | N139, I190, D199, H233        | N139, I190, D199, H233        | 4/4                     |
| 1TN3  | 1068  | D116, E120, G147, E150, N151, | D116, E120, G147, E150, N151, | 5/5                     |
|       | 1069  | Q143, D145, E150, D165        | Q143, D145, E150, D165        | 4/4                     |
| 2FIB  | 2036  | D318, D320, F322, G324        | D318, D320, F322, G324        | 4/4                     |
| 2TEP  | 7081  | D123, Y125, N127, D132        | D123, Y125, N127, D132        | 4/4                     |
|       | 7083  | D123, Y125, N127, D132        | D123, Y125, N127, D132        | 4/4                     |
|       | 7085  | D123, Y125, N127, D132        | D123, Y125, N127, D132        | 4/4                     |
|       | 7087  | D123, Y125, N127, D132        | D123, Y125, N127, D132        | 4/4                     |
|       | 4669  | D242, D288, Q292, V296        | D242, D288, Q292, V296        | 4/4                     |
| 4LIP  | 4670  | D242, D288, Q292, V296        | D242, D288, Q292, V296        | 4/4                     |
|       | 1897  | G2, D41, L75, N77, I79, V81   | G2, D41, L75, N77, I79, V81   | 6/6                     |
| 1C9M  | 1898  | A169, Y171, A174, G195 D197   | A169, A174, D197              | 3/5                     |
|       | 2739  | D16, D18, D20, A22, D27       | D16, D18, D20, A22, D27       | 5/5                     |
| 2SCP  | 2740  | D104,N106, D108, N110, E115   | D104,N106, D108, N110, E115   | 5/5                     |
|       | 2741  | D138, N140, D142, L144, E149  | D138, N140, D142, L144, E149  | 5/5                     |
|       | 2742  | D16, D18, D20, A22, D27       | D16, D18, D20, A22, D27       | 5/5                     |
|       | 2743  | D104,N106, D108, N110, E115   | D104,N106, D108, N110, E115   | 5/5                     |
|       | 2744  | D138, N140, D142, L144, E149  | D138, N140, D142, L144, E149  | 5/5                     |
|       | 1086  | N29, D32, N34, T37, H130      | N29, D32, N34, T37, H130      | 5/5                     |
|       | 2682  | D114, D116, T118, K120, N125  | D114, D116, T118, K120, N125  | 5/5                     |
| 2GGM  | 2683  | D150, D152, D154, E156, E161  | D150, D152, D154, E156, E161  | 5/5                     |
|       | 2684  | D114, D116, T118, K120, N125  | D114, D116, T118, K120, N125  | 5/5                     |
|       | 2685  | D150, D152, D154, E156, E161  | D150, D152, D154, E156, E161  | 5/5                     |
|       | 780   | D66, N68, D70, R72, E77       | D66, N68, D70, R72, E77       | 5/5                     |
| 3FIA  | 1417  | S20, E23, D25, T28, E33       | S20, E23, D25, T28, E33       | 5/5                     |
|       | 1418  | D61, D63, D65, E67, E72       | D61, D63, D65, E67, E72       | 5/5                     |
| 1K9K  | 1423  | S20, E23, D25, T28, E33       | S20, E23, D25, T28, E33       | 5/5                     |
|       | 1424  | D61, D63, D65, E67, E72       | D61, D63, D65, E67, E72       | 5/5                     |
| 1DAN* | 4723  | D46, G47, N49, D63, N64       | D46, G47, N49, D63, N64       | 5/5                     |
|       | 4724  | CGU                           | -                             |                         |
|       | 4725  | CGU                           | -                             |                         |
|       | 4726  | CGU                           | -                             |                         |
|       | 4727  | CGU                           | -                             |                         |
|       | 4728  | CGU                           | -                             |                         |
|       | 4729  | CGU                           | -                             |                         |
|       | 4730  | CGU                           | -                             |                         |
|       | 4731  | D70, D72, E75, E80            | D70, D72, E75, E80            | 4/4                     |
|       | 1MHO  | 713                           | S18, E21, D23, K26, E31       | S18, E21, D23, K26, E31 |
| 714   |       | D61, D63, D65, E67, E72       | D61, D63, D65, E67, E72       | 5/5                     |
| 1EDH  | 3230  | E11, E69, D100, Q101, D103    | E11, E69, D100, Q101, D103    | 5/5                     |
|       | 3231  | E11, D67, E69, D103           | E11, D67, E69, D103           | 4/4                     |



|      |      |                            |                            |     |
|------|------|----------------------------|----------------------------|-----|
| 2EGD | 3232 | E11, N12, D67, E69, D103   | E11, N12, D67, E69, D103   | 5/5 |
|      | 3234 | E11, E69, D100, Q101, D103 | E11, E69, D100, Q101, D103 | 5/5 |
|      | 3235 | E11, D67, E69, D103        | E11, D67, E69, D103        | 4/4 |
|      | 3236 | E11, N12, D67, E69, D103   | E11, N12, D67, E69, D103   | 5/5 |
|      | 1386 | A24, E27, R29, S32, E37    | A24, E27, R29, S32, E37    | 5/5 |
|      | 1387 | D64, N66, D68, E70, E75    | D64, N66, D68, E70, E75    | 5/5 |
|      | 1388 | A24, E27, R29, S32, E37    | A24, E27, R29, S32, E37    | 5/5 |
|      | 1389 | D64, N66, D68, E70, E75    | D64, N66, D68, E70, E75    | 5/5 |

<sup>a</sup>: metal identification number in PDB file. <sup>b</sup>: the correctly predicted ligands over documented ligands

**Table S7.** Prediction results on the NMR training dataset.

| Protein                                               | ID   | M <sup>a</sup> | L <sup>b</sup> | Real Ligands                 | Predicted Ligands            | R <sup>c</sup> |
|-------------------------------------------------------|------|----------------|----------------|------------------------------|------------------------------|----------------|
| Epidermal growth factor receptor pathway substrate 15 | 1C07 | 20             | 95             | D28, D30, D32, F34, E39      | D28, D30, D32, F34, S36, E39 | 5/5            |
| Calcium-binding protein NCS-1                         | 1FPW | 20             | 190            | D73, D75, N77, F79, E84      | D73, D75, N77, F79, E84      | 5/5            |
|                                                       |      |                |                | D109, N111, D113, Y115, E120 | D109, N111, D113, Y115, E120 | 5/5            |
|                                                       |      |                |                | D157, N159, D161, Y163, E168 | D157, N159, D161, Y163, E168 | 5/5            |
| Troponin C                                            | 1TNW | 23             | 162            | D30, D32, G34, D36, E41      | D30, G33, G34, D36, E41      | 5/5            |
|                                                       |      |                |                | D66, D68, S70, T72, E77      | D66, T72, D74, E77           | 3/5            |
|                                                       |      |                |                | D106, N108, D110, F112, E117 | D106, N108, D114, E117       | 4/5            |
|                                                       |      |                |                | D142, N144, D146, R148, E153 | D142, D146, R148, E150       | 4/5            |
| Calmodulin                                            | 2BBM | 1              | 148            | D20, D22, D24, T26, E31      | D24, T26, T28, E31           | 4/5            |
|                                                       |      |                |                | D56, D58, N60, T62, E67      | D56, D58, T62, E67           | 4/5            |
|                                                       |      |                |                | D93, D95, N97, Y99, E104     | D93, D95, N97, Y99, E104     | 5/5            |
|                                                       |      |                |                | N129, D131, D133, D135, E140 | N129, D131, D133, E140       | 4/5            |
| Calbindin D9K                                         | 2BCB | 32             | 75             | A14, E17, D19, Q22, E27      | A14, E17, D19, Q22, E27      | 5/5            |
|                                                       |      |                |                | D54, N56, D58, E60, E65      | D56, N58, E60, E65           | 4/5            |
| Parvalbumin                                           | 2PAS | 9              | 109            | D51, D53, S55, F57, E62      | D51, D53, S55, F57, E62      | 5/5            |
|                                                       |      |                |                | D90, D92, D94, K96, E101     | D90, D92, D94, K96, E101     | 5/5            |

<sup>a</sup>: number of structures in the ensembles. <sup>b</sup>: number of the residues in proteins. <sup>c</sup>: number of correctly predicted ligands over number of documented ligands.

**Table S8.** Prediction results on the NMR testing dataset.

| Protein                                                                                                       | X-ray | Chain | NMR  | Chain | Identity | M <sup>a</sup> | L <sup>b</sup> | Real Ligands                 | Predicted Ligands            | R <sup>c</sup> |
|---------------------------------------------------------------------------------------------------------------|-------|-------|------|-------|----------|----------------|----------------|------------------------------|------------------------------|----------------|
| SERINE PROTEASE PB92                                                                                          | 1C9M  | A     | 1AH2 | A     | 98%      | 18             | 269            | G2, D40, L75, N77, I79, V81  | S3, D40, L75, G78, I79       | 4/6            |
|                                                                                                               |       |       |      |       |          |                |                | A163, Y165, A168, G189, D191 | A163, R164, Y165, A168, D191 | 4/5            |
| Nereis diversicolor sarcoplasmic calcium-binding protein (NSCP)                                               | 2SCP  | B     | 1Q80 | A     | 100%     | 17             | 174            | D16, D18, D20, A22, D27      | D16, D18, A22, D27           | 4/5            |
|                                                                                                               |       |       |      |       |          |                |                | D104, N106, D108, N110, E115 | D104, N106, D108, N110, E115 | 5/5            |
|                                                                                                               |       |       |      |       |          |                |                | D138, N140, D142, L144, E149 | D138, N140, L144, E149       | 4/5            |
| human protein HSPCO34                                                                                         | 1TVG  | A     | 1XPW | A     | 100%     | 20             | 153            | N29, D32, N34, T37, H129     | N29, D32, N34, T37, H129     | 5/5            |
| the human centrin 2 in complex with a 17 residues peptide (P1-XPC) from xeroderma pigmentosum group C protein | 2GGM  | A     | 2A4J | A     | 100%     | 20             | 96             | D114, D116, T118, K120, N125 | D114, T118, K120             | 3/5            |
|                                                                                                               |       |       |      |       |          |                |                | D150, D152, D154, E156, E161 | -                            | 0/5            |
| human intersectin-1 protein**                                                                                 | 3FIA  | A     | 2KHN | A     | 99%      | 20             | 121            | D76, N78, D80, R82, E87      | D76, N78, R82, E87           | 4/5            |
| Staphylococcal nuclease                                                                                       | 1SNC  | A     | 1JOQ | A     | 99%      | 30             | 149            | D21, D40, T41, THP151        | D21, D40, T41                | 3/3            |
| Human blood coagulation FVII                                                                                  | 1DAN  | L     | 1F7E | A     | 100%     | 20             | 46             | D46, G47, N49, D63, N64      | D46, N49, D63                | 3/5            |
| S100B                                                                                                         | 1MHO  | A     | 1UWO | A, B  | 96%      | 20             | 91             | S18, E21, D23, K26, E31      | S18, E21, D23, K26           | 4/5            |
|                                                                                                               |       |       |      |       |          |                |                | D61, D63, D65, E67, E72      | D61, D63, E67, E72           | 4/5            |
|                                                                                                               |       |       |      |       |          |                |                | S18, E21, D23, K26, E31      | E21, D23, K26, E31           | 4/5            |
|                                                                                                               |       |       |      |       |          |                |                | D61, D63, D65, E67, E72      | D61, D63, E67, E72           | 4/5            |
| Epithelial cadherin                                                                                           | 1EDH  | A     | 1SUH | A     | 100%     | 20             | 146            | E11, E69, D100, Q101, D103   | E11, E69, Q101, D103         | 4/5            |
|                                                                                                               |       |       |      |       |          |                |                | E11, D67, E69, D103          | E11, N12, D67, E69           | 3/4            |
| S100A13                                                                                                       | 2EGD  | A     | 2K8M | B,C   | 100%     | 20             | 98             | A24, E27, R29, S32, E37      | A24, G28, R29, S32, E37      | 5/5            |
|                                                                                                               |       |       |      |       |          |                |                | D64, N66, D68, E70, E75      | D64, D68, E70, E75           | 4/5            |
|                                                                                                               |       |       |      |       |          |                |                | A24, E27, R29, S32, E37      | A24, G28, R29, S32, E37      | 5/5            |
|                                                                                                               |       |       |      |       |          |                |                | D64, N66, D68, E70, E75      | D64, D68, E70, E75           | 4/5            |

<sup>a</sup>: number of structures in the ensembles. <sup>b</sup>: number of the residues in proteins. <sup>c</sup>: number of correctly predicted ligands over number of documented ligand.

We modeled 199 equilibrium structures of calcium-binding protein (3ICB.pdb, 75 residues) by molecular dynamics using AMBER software package as follows. The two documented calcium ions were removed from the original protein structure. The resulting structure was solvated in a water box, followed by a short minimization, 60 ps of heating, 60 ps of density equilibration, and 500 ps of constant pressure equilibration at 300K. In production phase, 199 structures were generated in 2.4 ns. The strategy follows Walker and Steinbrecher <http://ambermd.org/tutorials/advanced/tutorial3/>. The RMSD below is calculated by aligning each modeled structure to original structure using CLICK.

**Table S9.** Testing on 199 conformations (PDB: 3ICB) modeled by molecular simulation.

| Model <sup>a</sup> | RMSD <sup>b</sup> | R <sup>c</sup> |
|--------------------|-------------------|----------------|
| 1                  | 1.67              | 2/2            |
| 2                  | 1.77              | 2/2            |
| 3                  | 1.61              | 2/2            |
| 4                  | 1.69              | 2/2            |
| 5                  | 1.56              | 2/2            |
| 6                  | 1.71              | 2/2            |
| 7                  | 1.68              | 2/2            |
| 8                  | 1.77              | 2/2            |
| 9                  | 1.89              | 2/2            |
| 10                 | 1.89              | 2/2            |
| 11                 | 1.72              | 2/2            |
| 12                 | 1.91              | 2/2            |
| 13                 | 1.70              | 2/2            |
| 14                 | 1.84              | 2/2            |
| 15                 | 2.00              | 2/2            |
| 16                 | 1.77              | 2/2            |
| 17                 | 1.70              | 2/2            |
| 18                 | 1.75              | 2/2            |
| 19                 | 1.79              | 2/2            |
| 20                 | 1.68              | 2/2            |
| 21                 | 1.83              | 2/2            |
| 22                 | 1.61              | 2/2            |
| 23                 | 1.73              | 2/2            |
| 24                 | 1.74              | 2/2            |
| 25                 | 1.70              | 2/2            |
| 26                 | 1.83              | 2/2            |
| 27                 | 1.76              | 2/2            |
| 28                 | 1.83              | 2/2            |
| 29                 | 1.90              | 2/2            |
| 30                 | 1.80              | 2/2            |
| 31                 | 1.58              | 2/2            |
| 32                 | 1.76              | 2/2            |
| 33                 | 1.91              | 2/2            |
| 34                 | 1.74              | 2/2            |
| 35                 | 1.66              | 2/2            |
| 36                 | 1.69              | 2/2            |
| 37                 | 1.89              | 2/2            |
| 38                 | 1.77              | 2/2            |
| 39                 | 1.71              | 2/2            |

|     |      |     |
|-----|------|-----|
| 40  | 1.69 | 2/2 |
| 41  | 1.86 | 2/2 |
| 42  | 1.74 | 2/2 |
| 43  | 1.68 | 2/2 |
| 44  | 1.64 | 2/2 |
| 45  | 1.75 | 2/2 |
| 46  | 1.58 | 2/2 |
| 47  | 1.54 | 2/2 |
| 48  | 1.65 | 2/2 |
| 49  | 1.67 | 2/2 |
| 50  | 1.70 | 2/2 |
| 51  | 1.68 | 2/2 |
| 52  | 1.86 | 2/2 |
| 53  | 1.74 | 2/2 |
| 54  | 1.53 | 2/2 |
| 55  | 1.48 | 1/2 |
| 56  | 1.56 | 2/2 |
| 57  | 1.79 | 2/2 |
| 58  | 1.82 | 2/2 |
| 59  | 1.60 | 2/2 |
| 60  | 1.67 | 2/2 |
| 61  | 1.62 | 2/2 |
| 62  | 1.78 | 2/2 |
| 63  | 1.60 | 2/2 |
| 64  | 1.59 | 2/2 |
| 65  | 1.68 | 2/2 |
| 66  | 1.81 | 2/2 |
| 67  | 1.83 | 2/2 |
| 68  | 1.61 | 2/2 |
| 69  | 1.68 | 2/2 |
| 70  | 1.76 | 2/2 |
| 71  | 1.74 | 2/2 |
| 72  | 1.79 | 2/2 |
| 73  | 1.70 | 2/2 |
| 74  | 1.57 | 2/2 |
| 75  | 1.64 | 2/2 |
| 76  | 1.71 | 2/2 |
| 77  | 1.69 | 2/2 |
| 78  | 1.60 | 2/2 |
| 79  | 1.63 | 2/2 |
| 80  | 1.84 | 2/2 |
| 81  | 1.53 | 2/2 |
| 82  | 1.64 | 2/2 |
| 83  | 1.62 | 2/2 |
| 84  | 1.73 | 2/2 |
| 85  | 1.80 | 2/2 |
| 86  | 1.68 | 2/2 |
| 87  | 1.52 | 2/2 |
| 88  | 1.55 | 1/2 |
| 89  | 1.73 | 2/2 |
| 90  | 1.69 | 2/2 |
| 91  | 1.66 | 2/2 |
| 92  | 1.70 | 2/2 |
| 93  | 1.79 | 2/2 |
| 94  | 1.66 | 2/2 |
| 95  | 1.70 | 2/2 |
| 96  | 1.77 | 2/2 |
| 97  | 1.78 | 2/2 |
| 98  | 1.59 | 2/2 |
| 99  | 1.54 | 2/2 |
| 100 | 1.57 | 2/2 |
| 101 | 1.55 | 2/2 |
| 102 | 1.52 | 2/2 |
| 103 | 1.52 | 2/2 |
| 104 | 1.45 | 2/2 |

|     |      |     |
|-----|------|-----|
| 105 | 1.58 | 2/2 |
| 106 | 1.53 | 2/2 |
| 107 | 1.64 | 2/2 |
| 108 | 1.64 | 2/2 |
| 109 | 1.61 | 2/2 |
| 110 | 1.78 | 2/2 |
| 111 | 1.67 | 2/2 |
| 112 | 1.72 | 2/2 |
| 113 | 1.50 | 2/2 |
| 114 | 1.44 | 2/2 |
| 115 | 1.54 | 2/2 |
| 116 | 1.51 | 2/2 |
| 117 | 1.66 | 2/2 |
| 118 | 1.85 | 2/2 |
| 119 | 1.84 | 2/2 |
| 120 | 1.73 | 2/2 |
| 121 | 1.78 | 2/2 |
| 122 | 1.66 | 1/2 |
| 123 | 1.81 | 1/2 |
| 124 | 1.70 | 1/2 |
| 125 | 1.55 | 2/2 |
| 126 | 1.61 | 2/2 |
| 127 | 1.60 | 2/2 |
| 128 | 1.52 | 2/2 |
| 129 | 1.57 | 2/2 |
| 130 | 1.64 | 2/2 |
| 131 | 1.54 | 2/2 |
| 132 | 1.55 | 2/2 |
| 133 | 1.45 | 2/2 |
| 134 | 1.61 | 2/2 |
| 135 | 1.58 | 2/2 |
| 136 | 1.49 | 2/2 |
| 137 | 1.58 | 2/2 |
| 138 | 1.53 | 2/2 |
| 139 | 1.63 | 2/2 |
| 140 | 1.52 | 2/2 |
| 141 | 1.68 | 2/2 |
| 142 | 1.61 | 2/2 |
| 143 | 1.51 | 2/2 |
| 144 | 1.62 | 1/2 |
| 145 | 1.54 | 2/2 |
| 146 | 1.50 | 2/2 |
| 147 | 1.47 | 2/2 |
| 148 | 1.61 | 2/2 |
| 149 | 1.61 | 2/2 |
| 150 | 1.58 | 2/2 |
| 151 | 1.59 | 2/2 |
| 152 | 1.55 | 2/2 |
| 153 | 1.51 | 2/2 |
| 154 | 1.43 | 2/2 |
| 155 | 1.43 | 1/2 |
| 156 | 1.45 | 2/2 |
| 157 | 1.45 | 2/2 |
| 158 | 1.48 | 2/2 |
| 159 | 1.54 | 2/2 |
| 160 | 1.64 | 2/2 |
| 161 | 1.61 | 2/2 |
| 162 | 1.52 | 2/2 |
| 163 | 1.53 | 2/2 |
| 164 | 1.46 | 2/2 |
| 165 | 1.52 | 2/2 |
| 166 | 1.54 | 1/2 |
| 167 | 1.70 | 2/2 |
| 168 | 1.78 | 2/2 |
| 169 | 1.76 | 1/2 |

|     |      |     |
|-----|------|-----|
| 170 | 1.77 | 1/2 |
| 171 | 1.68 | 1/2 |
| 172 | 1.75 | 2/2 |
| 173 | 1.65 | 2/2 |
| 174 | 1.61 | 2/2 |
| 175 | 1.59 | 2/2 |
| 176 | 1.54 | 2/2 |
| 177 | 1.51 | 1/2 |
| 178 | 1.52 | 2/2 |
| 179 | 1.50 | 2/2 |
| 180 | 1.58 | 2/2 |
| 181 | 1.70 | 2/2 |
| 182 | 1.65 | 2/2 |
| 183 | 1.62 | 2/2 |
| 184 | 1.61 | 1/2 |
| 185 | 1.62 | 1/2 |
| 186 | 1.70 | 2/2 |
| 187 | 1.67 | 2/2 |
| 188 | 1.53 | 2/2 |
| 189 | 1.73 | 2/2 |
| 190 | 1.58 | 2/2 |
| 191 | 1.62 | 2/2 |
| 192 | 1.75 | 2/2 |
| 193 | 1.69 | 2/2 |
| 194 | 1.65 | 2/2 |
| 195 | 1.59 | 2/2 |
| 196 | 1.61 | 2/2 |
| 197 | 1.61 | 2/2 |
| 198 | 1.50 | 2/2 |
| 199 | 1.57 | 2/2 |

<sup>a</sup> Model number. <sup>b</sup> RMSD between model and experimental X-ray structure. <sup>c</sup> the correctly predicted sites over total predicted sites.

### **Non-redundant metal binding proteins resources:**

Protein structures in Tables S9 and S10 are from the published dataset .<sup>35</sup>

Protein structures in Table S11 are from a survey of PDB with the following criteria.

1. X-ray resolution is better than 2.5 Å.
2. There is a Protein chain but not any DNA or RNA or Hybrid.
3. Structures contain desired metal.
4. Sequences with more than 30% similarity are removed.

### **Mis-classification criteria:**

We consider that the algorithm mis-classified a binding site if it predicted a  $\text{Ca}^{2+}$  within 3.0 Å (usually the metal oxygen distance is less than this value) of the documented non- $\text{Ca}^{2+}$  metal.<sup>32,39</sup>

Classification as “Other” indicates that the predicted  $\text{Ca}^{2+}$ -binding site may represent true binding sites that have not yet been identified as such, or have been identified as binding sites for other metal divalent ions that may bind different metals, which may include  $\text{Ca}^{2+}$ .



**Table S10.** Testing on Mg<sup>2+</sup>-binding proteins (X-ray structures).

| PDB <sup>a</sup> | Res <sup>b</sup> | Protein <sup>c</sup>                       | Chain <sup>d</sup> | Mg# <sup>e</sup> | Mis-classified <sup>f</sup> |
|------------------|------------------|--------------------------------------------|--------------------|------------------|-----------------------------|
| 1CMC             | 1.8              | Met repressor (metj)                       | A,B                | 1693             | No                          |
|                  |                  |                                            |                    | 1721             | No                          |
| 1EBH             | 2.2              | Enolase                                    | A,B                | 6631             | No                          |
|                  |                  |                                            |                    | 6633             | No                          |
| 1XLB             | 2.3              | D-xylose isomerase                         | A                  | 6055             | No                          |
| 1CHN             | 1.6              | Chey                                       | A                  | 968              | No                          |
| 1EO3             | 1.9              | Restriction enzyme <i>ecoRV</i>            | A,B                | 4229             | No                          |
|                  |                  |                                            |                    | 4230             | No                          |
|                  |                  |                                            |                    | 4235             | No                          |
|                  |                  |                                            |                    | 4236             | No                          |
| 1VSD             | 1.9              | Integrase                                  | A                  | 1129             | No                          |
| 1MUS             | 2.5              | Adenine phosphoribosyltransferase          | A,B                | 4435             | No                          |
|                  |                  |                                            |                    | 4436             | No                          |
| 1QB7             | 1.9              | Xanthine-guanine phosphoribosyltransferase | A                  | 1857             | No                          |
| 1EYJ             | 2.1              | Fructose-1,6-bisphosphatase                | A,B                | 5011             | No                          |
|                  |                  |                                            |                    | 5056             | No                          |
| 2UAG             | 1.7              | D-glutamate ligase                         | A                  | 3247             | No                          |
|                  |                  |                                            | A                  | 3248             | No                          |
| 3PRN             | 1.9              | Porin                                      | A                  | 2203             | No                          |
| 1HBN             | 1.1              | Methyl-coenzyme m reductase                | B                  | 19432            | No                          |
|                  |                  |                                            | D                  | 19557            | No                          |
|                  |                  |                                            | E                  | 19570            | No                          |
| 2TCT             | 2.1              | Tetracycline repressor                     | A                  | 1575             | No                          |
| 1LUC             | 1.5              | Bacterial luciferase                       | A                  | 5096             | No                          |
|                  |                  |                                            | B                  | 5106             | No                          |
| 1KQP             | 1.0              | Nh(3)-dependent nad(+) synthetase          | B                  | 8739             | No                          |
| 1NG1             | 2.0              | Signal sequence recognition protein FFH    | A                  | 2279             | No                          |
| 1BL3             | 2.0              | Integrase                                  | B                  | 3445             | No                          |
| 1NUL             | 1.8              | Xanthine-guanine phosphoribosyltransferase | A                  | 2159             | No                          |
| 2UAG             | 1.7              | D-glutamate ligase                         | A                  | 3247             | No                          |
| 1IDE             | 2.5              | Isocitrate dehydrogenase                   | A                  | 3881             | No                          |
| 1JIV             | 2.0              | DNA beta-glucosyltransferase               | A                  | 2871             | No                          |
|                  |                  |                                            | A                  | 2872             | No                          |
| 1DOZ             | 1.8              | Ferrochelatae                              | A                  | 2490             | No                          |
| 1G8T             | 1.1              | Nuclease sm2 isoform                       | A                  | 3878             | No                          |
| 1A73             | 1.8              | Intron 3 (i-ppo) encoded endonuclease      | A                  | 3353             | No                          |
| 1FWK             | 2.1              | Homoserine kinase                          | D                  | 9162             | No                          |
| 1JKK             | 2.4              | Death-associated protein kinase            | A                  | 2247             | No                          |
| 1LDF             | 2.1              | Glycerol uptake facilitator                | A                  | 1936             | No                          |
| 1OBW             | 2.1              | Inorganic pyrophosphatase                  | A,B,C              | 4141             | Other                       |
|                  |                  |                                            |                    | 4142             | No                          |
|                  |                  |                                            |                    | 4143             | No                          |
|                  |                  |                                            |                    | 4144             | Other                       |
|                  |                  |                                            |                    | 4145             | No                          |
|                  |                  |                                            |                    | 4146             | No                          |
| 1KCZ             | 1.9              | Beta-methylaspartase                       | A,B                | 6431             | Other                       |
|                  |                  |                                            |                    | 6440             | Other                       |
| 1RK2             | 1.8              | Ribokinase                                 | A,B,C,D            | 8992             | Other                       |
|                  |                  |                                            |                    | 9035             | Other                       |
|                  |                  |                                            |                    | 9078             | Other                       |
|                  |                  |                                            |                    | 9121             | Other                       |

<sup>a</sup> PDB code. <sup>b</sup> PDB resolution. <sup>c</sup> Protein name. <sup>d</sup> Chain number. <sup>e</sup> metal identification number in PDB file. <sup>f</sup> mistakenly classified Mg<sup>2+</sup>-binding site as Ca<sup>2+</sup>-binding site.

**Table S11.** Testing on Zn<sup>2+</sup>-binding proteins (X-ray structures).

| PDB <sup>a</sup> | Res <sup>b</sup> | Protein <sup>c</sup>                          | Chain <sup>d</sup> | Zn# <sup>e</sup> | Mis-classified <sup>f</sup> |
|------------------|------------------|-----------------------------------------------|--------------------|------------------|-----------------------------|
| 1FWZ             | 2.3              | Diphtheria toxin repressor                    | A                  | 1588             | No                          |
| 1CY5             | 1.3              | Apoptotic protease activating factor 1        | A                  | 749              | No                          |
|                  |                  |                                               |                    | 750              | No                          |
| 1WEJ             | 1.8              | E8 antibody                                   | A                  | 752              | No                          |
|                  |                  |                                               |                    | 4170             | No                          |
| 1E67             | 2.1              | Azurin                                        | A,B,C,D            | 3901             | No                          |
|                  |                  |                                               |                    | 3906             | No                          |
|                  |                  |                                               |                    | 3907             | No                          |
|                  |                  |                                               |                    | 3908             | No                          |
| 1GS8             | 1.9              | Nitrite reductase                             | A                  | 2590             | No                          |
|                  |                  |                                               |                    | 2591             | No                          |
| 1F5F             | 1.7              | Sex hormone-binding globulin                  | A                  | 1369             | No                          |
|                  |                  |                                               |                    | 1370             | No                          |
| 1GI4             | 1.3              | Beta-trypsin                                  | A                  | 3369             | No                          |
| 2CBA             | 1.5              | Carbonic anhydrase                            | A                  | 2081             | No                          |
| 1F3Z             | 1.9              | Glucose-specific phosphocarrier               | A                  | 1109             | No                          |
| 1C8Y             | 2.0              | Endo-beta-n-acetyl-glucosaminidase H          | A                  | 2015             | No                          |
| 4ENL             | 1.9              | Enolase                                       | A                  | 3291             | No                          |
| 1I6N             | 1.8              | Loli protein                                  | A                  | 2231             | No                          |
| 1IM5             | 1.6              | Pyrazinamidase                                | A                  | 1439             | No                          |
| 1VSH             | 1.9              | Integrase                                     | A                  | 1129             | No                          |
|                  |                  |                                               |                    | 1130             | No                          |
|                  |                  |                                               |                    | 1131             | No                          |
| 1NOY             | 2.2              | DNA polymerase                                | A                  | 5953             | No                          |
| 2CTB             | 1.5              | Carboxypeptidase A                            | A                  | 2452             | No                          |
| 1TOA             | 1.8              | Periplasmic binding protein                   | A,B                | 4295             | No                          |
|                  |                  |                                               |                    | 4302             | No                          |
| 1A2P             | 1.5              | Barnase                                       | A,B,C              | 2628             | No                          |
|                  |                  |                                               |                    | 2629             | No                          |
|                  |                  |                                               |                    | 2630             | No                          |
| 1EU3             | 1.6              | Superantigen Smez-2                           | A,B                | 3419             | No                          |
|                  |                  |                                               |                    | 3436             | No                          |
| 1EWC             | 1.9              | Enterotoxin H                                 | A                  | 1733             | No                          |
| 1EU4             | 2.5              | Superantigen spe-H                            | A                  | 1668             | No                          |
| 1AST             | 1.8              | Astacin                                       | A                  | 1593             | No                          |
| 1ZFP             | 1.8              | Growth factor receptor binding protein        | E                  | 870              | No                          |
| 1K4P             | 1.0              | 3,4-dihydroxy-2-butanone 4-phosphate synthase | A                  | 1643             | No                          |
| 1K9Z             | 1.5              | Halotolerance protein HAL2                    | A                  | 2731             | No                          |
|                  |                  |                                               |                    | 2732             | No                          |
|                  |                  |                                               |                    | 2735             | No                          |
|                  |                  |                                               |                    | 2733             | No                          |
| 1CNQ             | 2.2              | Fructose-1,6-bisphosphatase                   | A                  | 2572             | No                          |
| 1KSP             | 2.3              | Klenow fragment                               | A                  | 4817             | No                          |
| 3IVE             | 2.0              | Immunoglobulin                                | A                  | 893              | No                          |
| 1M5E             | 1.4              | Glutamate receptor 2                          | A                  | 6150             | No                          |
| 1L7O             | 2.2              | Phosphoserine phosphatase                     | B                  | 3208             | No                          |
| 8RNT             | 1.8              | Ribonuclease T1                               | A                  | 779              | No                          |
| 1XLL             | 2.5              | D-xylose isomerase                            | A,B                | 6057             | Other                       |
|                  |                  |                                               |                    | 6058             | No                          |
|                  |                  |                                               |                    | 6059             | Other                       |
|                  |                  |                                               |                    | 6060             | No                          |

<sup>a</sup> PDB code. <sup>b</sup> PDB resolution. <sup>c</sup> Protein name. <sup>d</sup> Chain number. <sup>e</sup> metal identification number in PDB file. <sup>f</sup> mistakenly classified Zn<sup>2+</sup>-binding site as Ca<sup>2+</sup>-binding site.

**Table S12.** Testing on Pb<sup>2+</sup>-binding proteins (X-ray structures).

| PDB <sup>a</sup> | Res <sup>b</sup> | Protein <sup>c</sup>                 | Chain <sup>d</sup> | Pb# <sup>e</sup> | Mis-classified <sup>f</sup> |
|------------------|------------------|--------------------------------------|--------------------|------------------|-----------------------------|
| 1E9N             | 2.20             | DNA-lyase                            | A,B                | 4339             | No                          |
|                  |                  |                                      |                    | 4340             | No                          |
|                  |                  |                                      |                    | 4341             | No                          |
|                  |                  |                                      |                    | 4342             | No                          |
| 1FJR             | 2.3              | Methuselah ectodomain                | A,B                | 3120             | No                          |
|                  |                  |                                      |                    | 3121             | No                          |
|                  |                  |                                      |                    | 3169             | No                          |
|                  |                  |                                      |                    | 3170             | No                          |
| 1NA0             | 1.60             | Designed protein CTPR3               | A,B                | 1969             | No                          |
|                  |                  |                                      |                    | 1970             | No                          |
|                  |                  |                                      |                    | 1975             | No                          |
|                  |                  |                                      |                    | 1976             | No                          |
|                  |                  |                                      |                    | 1977             | No                          |
| 1QNV             | 2.5              | 5-aminolaevulinic acid dehydratase   | A                  | 2548             | No                          |
|                  |                  |                                      |                    | 2549             | No                          |
| 1SN8             | 2.00             | Ribonuclease E                       | A,B                | 1330             | No                          |
| 1SYU             | 1.7              | Ribonucleoside-diphosphate reductase | A                  | 1331             | No                          |
| 1XXA             | 2.20             | Arginine repressor                   | A~F                | 2617             | No                          |
|                  |                  |                                      |                    | 3245             | No                          |
|                  |                  |                                      |                    | 3246             | No                          |
|                  |                  |                                      |                    | 3259             | No                          |
| 1ZHY             | 1.6              | KES1 protein                         | A                  | 3284             | No                          |
|                  |                  |                                      |                    | 3516             | No                          |
|                  |                  |                                      |                    | 3517             | No                          |
| 2CH7             | 2.5              | Methyl-accepting chemotaxis protein  | A,B                | 4633             | No                          |
| 2FJ9             | 1.6              | Acyl-CoA-Binding protein             | A                  | 4634             | No                          |
| 2FP1             | 1.55             | Chorismate mutase                    | A                  | 710              | No                          |
| 2OQ1             | 1.9              | Tyrosine-protein kinase              | A,B                | 2705             | No                          |
|                  |                  |                                      |                    | 2706             | No                          |
| 2QD5             | 2.3              | Ferrochelatase                       | A,B                | 2200             | No                          |
|                  |                  |                                      |                    | 5845             | No                          |
|                  |                  |                                      |                    | 5846             | No                          |
|                  |                  |                                      |                    | 5965             | No                          |
| 2QKL             | 2.3              | Hydrolase                            | A,B                | 5966             | No                          |
|                  |                  |                                      |                    | 1772             | No                          |
| 3EC8             | 2.6              | FLJ10324                             | A                  | 1083             | No                          |
|                  |                  |                                      |                    | 1084             | No                          |
| 3FHH             | 2.6              | Outer membrane heme receptor ShuA    | A                  | 4778             | No                          |
|                  |                  |                                      |                    | 4779             | No                          |
|                  |                  |                                      |                    | 4780             | No                          |
|                  |                  |                                      |                    | 4781             | No                          |
| 1HD7             | 1.95             | DNA-lyase                            | A                  | 2072             | Other                       |
| 2G0A             | 2.35             | Cytosolic 5'-nucleotidase III        | A,B                | 4655             | Other                       |
|                  |                  |                                      |                    | 4671             | Other                       |
| 2O3C             | 2.30             | APEX nuclease 1                      | A,B                | 6648             | Other                       |
|                  |                  |                                      |                    | 6649             | No                          |
|                  |                  |                                      |                    | 6650             | Other                       |

<sup>a</sup> PDB code. <sup>b</sup> PDB resolution. <sup>c</sup> Protein name. <sup>d</sup> Chain number. <sup>e</sup> metal identification number in PDB file. <sup>f</sup> mistakenly classified Pb<sup>2+</sup>-binding site as Ca<sup>2+</sup>-binding site.

**Table S13.** Testing on a negative control dataset (X-ray structures).

| PDB <sup>a</sup> | Protein <sup>b</sup>                                                                | FN <sup>c</sup> |
|------------------|-------------------------------------------------------------------------------------|-----------------|
| 1DTS             | Dethiobiotin synthase                                                               | 0               |
| 1L68             | Lysozyme                                                                            | 0               |
| 1PTX             | Scorpion toxin II                                                                   | 0               |
| 1VCC             | DNA topoisomerase I                                                                 | 0               |
| 1WBA             | Winged bean albumin 1                                                               | 0               |
| 2ENG             | Endoglucanase V                                                                     | 0               |
| 2YLE             | Human spir-1 kind fsi domain in complex with the fsi peptide                        | 0               |
| 3O5F             | Fk1 domain of FKBP51                                                                | 0               |
| 3OQ7             | Multidrug-Resistant Clinical Isolate 769 HIV-1 Protease Variants                    | 0               |
| 1IQR             | DNA photolyase                                                                      | 0               |
| 1IUG             | Aspartate aminotransferase which belongs to subgroup IV                             | 0               |
| 1IZ0             | Quinone Oxidoreductase                                                              | 0               |
| 1J27             | Hypothetical protein, TT1725                                                        | 0               |
| 1J3M             | Conserved hypothetical protein TT1751                                               | 0               |
| 1JJF             | Feruloyl esterase domain of the cellulosomal xylanase z of clostridium thermocellum | 0               |
| 1TCA             | Lipase                                                                              | 2               |
| 2OLB             | Oligo-peptide binding protein                                                       | 4               |
| 1TTB             | Transthyretin                                                                       | 2               |
| 1BDM             | Malate Dehydrogenase                                                                | 5               |
| 1K4N             | Protein EC4020                                                                      | 3               |
| 2AQJ             | Tryptophan 7-halogenase (PrnA)                                                      | 5               |
| 1ISO             | Isocitrate dehydrogenase                                                            | 2               |
| 1SGV             | Trna psi55 pseudouridine synthase (trub)                                            | 3               |

<sup>a</sup> PDB code. <sup>b</sup> Protein name. <sup>c</sup> Number of False Negative predictions.
